# Supplementary material
Source: MDPI journal article supplement (https://www.mdpi.com/2076-3417/10/11/3773)
Supplement: s1 [file s1]

# Effects of Class Purity of Training Patch on Classification Performance of Crop Classification with Convolutional Neural Network

Soyeon Park and No-Wook Park \*

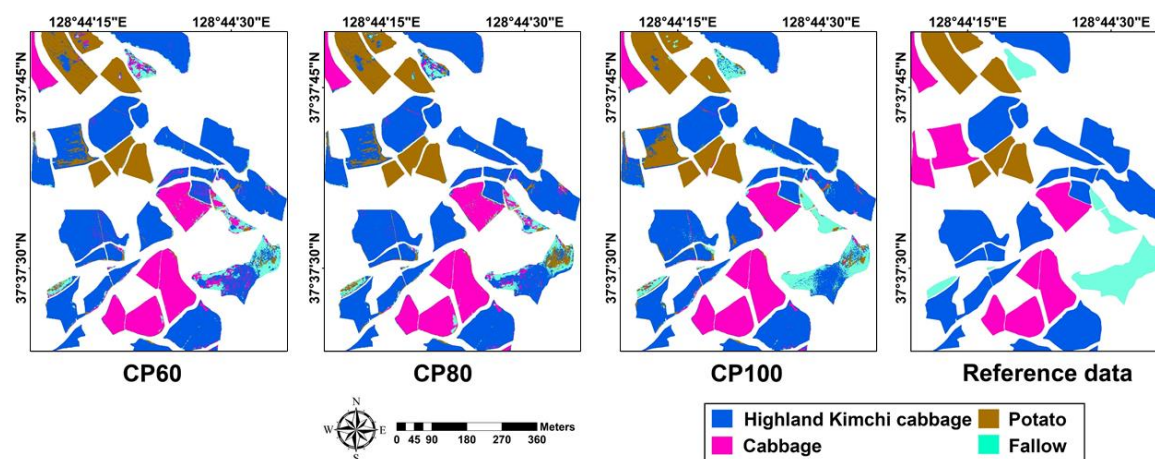

(a)

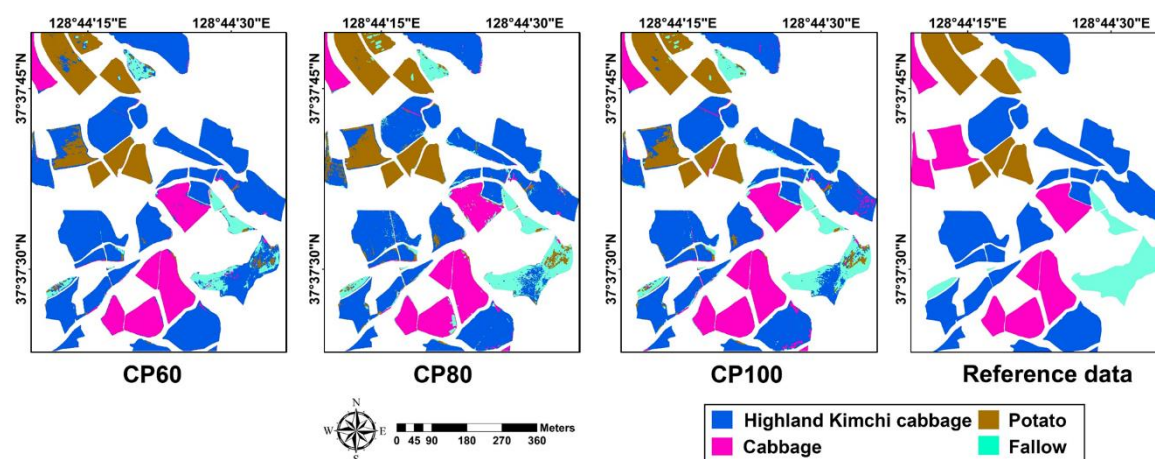

(b)

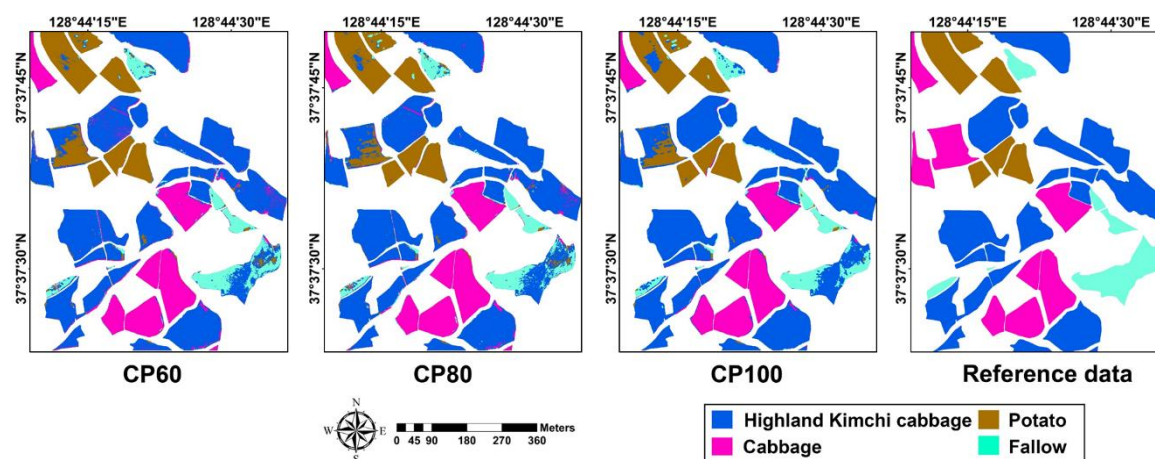

(c)

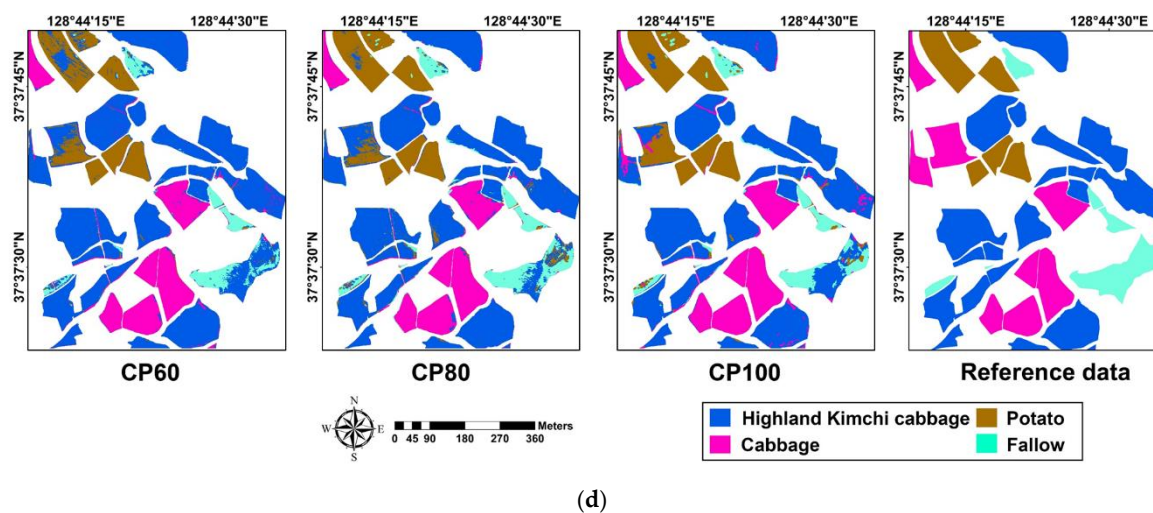

**Figure S1.** Classification results generated using other patch sizes and different class purity values in Anbandegi: (a) 5 by 5 patch; (b) 13 by 13 patch, (c) 15 by 15 patch; and (d) 21 by 21 patch. Each map is one of four classification results with the highest overall accuracy.

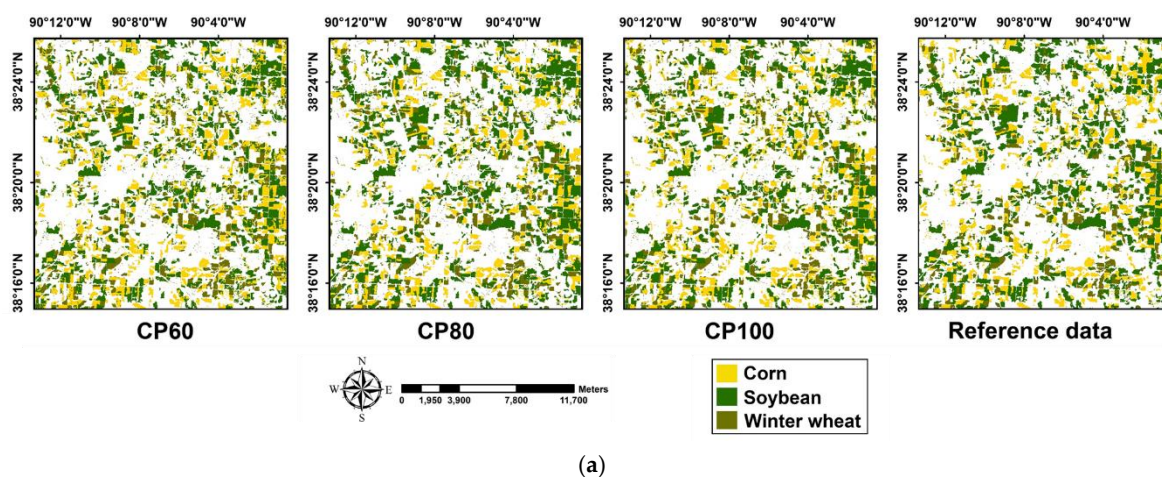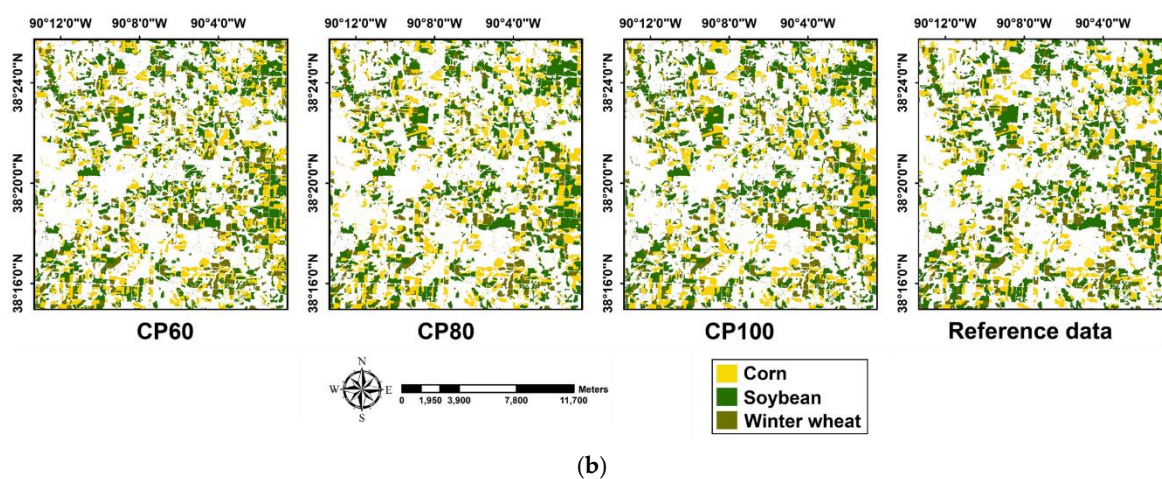



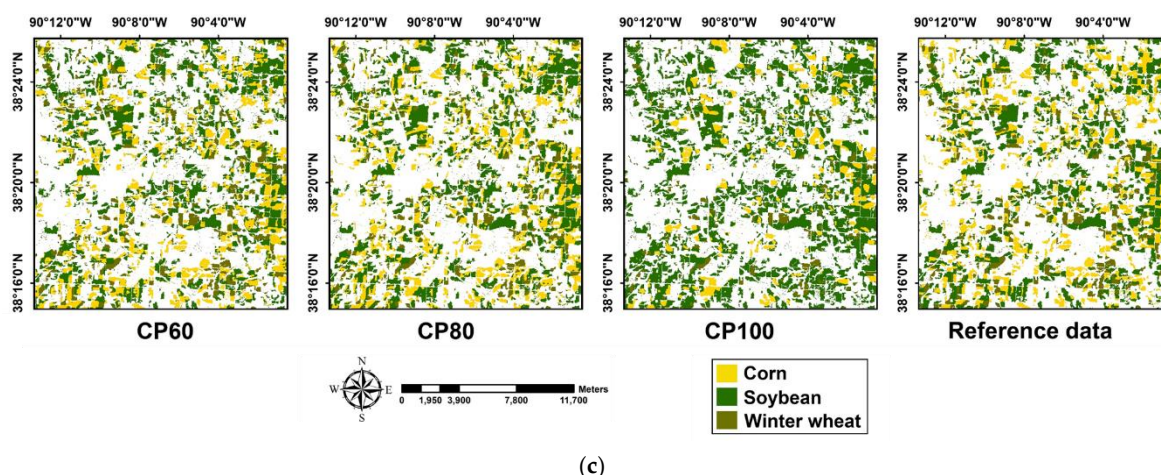

**Figure S2.** Classification results generated using other patch sizes and different class purity values in Illinois: (a) 5 by 5 patch; (b) 9 by 9 patch; and (c) 15 by 15 patch. Each map is one of four classification results with the highest overall accuracy.

**Table S1.** Accuracy statistics of the classification results using other patch sizes and different class purity values in Anbandegi (PA: producer's accuracy; UA: user's accuracy; OA: overall accuracy). Classification accuracy values from one of four classification results with the highest overall accuracy are displayed.

| 5 by 5 patch            | CP60   |        | CP80   |        | CP100  |        |
|-------------------------|--------|--------|--------|--------|--------|--------|
|                         | PA (%) | UA (%) | PA (%) | UA (%) | PA (%) | UA (%) |
| Highland Kimchi cabbage | 93.39  | 83.14  | 95.36  | 82.37  | 93.67  | 87.84  |
| Cabbage                 | 71.37  | 82.56  | 70.39  | 88.49  | 72.15  | 94.40  |
| Potato                  | 92.43  | 83.99  | 94.82  | 78.78  | 96.97  | 73.07  |
| Fallow                  | 41.62  | 70.65  | 33.18  | 74.34  | 60.76  | 77.18  |
| OA (%)                  | 82.35  |        | 82.54  |        | 85.39  |        |
| 13 by 13 patch          | CP60   |        | CP80   |        | CP100  |        |
|                         | PA (%) | UA (%) | PA (%) | UA (%) | PA (%) | UA (%) |
| Highland Kimchi cabbage | 97.74  | 83.76  | 92.26  | 92.19  | 92.99  | 89.31  |
| Cabbage                 | 71.62  | 95.60  | 70.27  | 94.49  | 72.45  | 91.61  |
| Potato                  | 95.03  | 80.15  | 96.84  | 69.10  | 96.73  | 75.79  |
| Fallow                  | 48.29  | 91.01  | 76.44  | 72.95  | 72.53  | 79.44  |
| OA (%)                  | 85.71  |        | 85.90  |        | 86.36  |        |
| 17 by 17 patch          | CP60   |        | CP80   |        | CP100  |        |
|                         | PA (%) | UA (%) | PA (%) | UA (%) | PA (%) | UA (%) |
| Highland Kimchi cabbage | 93.31  | 86.43  | 94.91  | 84.84  | 97.25  | 83.32  |
| Cabbage                 | 72.41  | 87.50  | 72.60  | 91.38  | 71.35  | 96.52  |
| Potato                  | 96.74  | 78.89  | 94.66  | 82.66  | 91.83  | 84.92  |
| Fallow                  | 63.54  | 88.56  | 59.44  | 83.77  | 59.03  | 86.06  |
| OA (%)                  | 85.53  |        | 85.65  |        | 86.11  |        |
| 21 by 21 patch          | CP60   |        | CP80   |        | CP100  |        |
|                         | PA (%) | UA (%) | PA (%) | UA (%) | PA (%) | UA (%) |
| Highland Kimchi cabbage | 95.98  | 81.89  | 94.66  | 86.17  | 94.40  | 87.87  |
| Cabbage                 | 72.20  | 91.42  | 70.73  | 94.69  | 75.55  | 90.36  |
| Potato                  | 85.81  | 81.11  | 95.62  | 77.51  | 96.30  | 76.36  |
| Fallow                  | 53.04  | 91.12  | 68.14  | 85.57  | 58.36  | 85.97  |

|        |       |       |       |
|--------|-------|-------|-------|
| OA (%) | 84.17 | 86.16 | 86.21 |
|--------|-------|-------|-------|

**Table S2.** Accuracy statistics of the classification results using other patch sizes and different class purity values in Illinois (PA: producer's accuracy; UA: user's accuracy; OA: overall accuracy). Classification accuracy values from one of four classification results with the highest overall accuracy are displayed.

| 5 by 5 patch | CP60  |       | CP80  |       | CP100 |       |
|--------------|-------|-------|-------|-------|-------|-------|
|              | PA(%) | UA(%) | PA(%) | UA(%) | PA(%) | UA(%) |
| Corn         | 83.73 | 74.33 | 78.12 | 84.90 | 78.22 | 77.05 |
| Soybean      | 77.49 | 87.91 | 85.54 | 86.15 | 78.16 | 85.60 |
| Winter wheat | 96.26 | 86.10 | 97.20 | 81.17 | 97.49 | 77.64 |
| OA(%)        | 82.47 |       | 84.85 |       | 81.15 |       |

  

| 15 by 15 patch | CP60  |       | CP80  |       | CP100 |       |
|----------------|-------|-------|-------|-------|-------|-------|
|                | PA(%) | UA(%) | PA(%) | UA(%) | PA(%) | UA(%) |
| Corn           | 73.27 | 72.35 | 70.66 | 69.37 | 35.44 | 71.95 |
| Soybean        | 78.82 | 80.17 | 79.59 | 78.83 | 90.12 | 60.33 |
| Winter wheat   | 84.95 | 82.59 | 73.22 | 78.94 | 41.41 | 89.53 |
| OA(%)          | 77.90 |       | 75.62 |       | 64.33 |       |
